# Supplementary material
Source: PubMed Central journal article supplement (PMC11477818)
Supplement: ajcr0014-4353-f8.pdf [file ajcr0014-4353-f8.pdf]

# Role of FXYD3 as a potential oncogene and early biomarker in pancreatic cancer

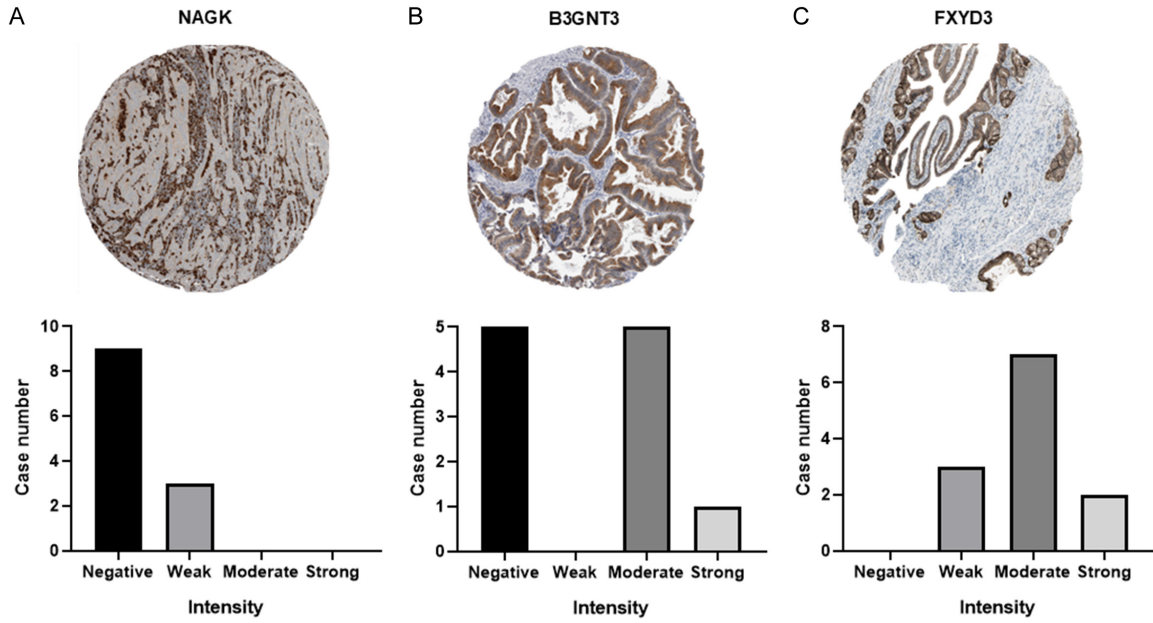

**Figure S1.** The protein expression of pancreatic cancer patients (n=12) by HPA database. The intensity of antibody of (A) NAGK, (B) B3GNT3, (C) FXYD3. X axis represents the intensity of the antibody and Y axis represents the case number.

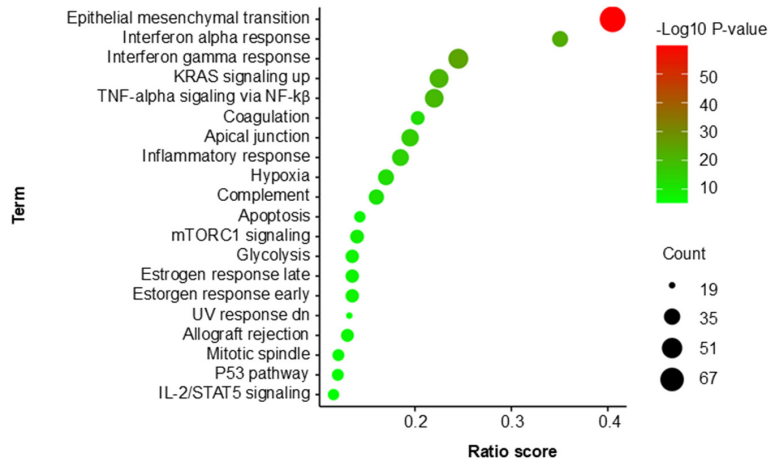

**Figure S2.** Pathway enrichment analysis of GEO datasets. The dot plot shows the top 20 pathways from the MSigDb.

Role of FXYD3 as a potential oncogene and early biomarker in pancreatic cancer

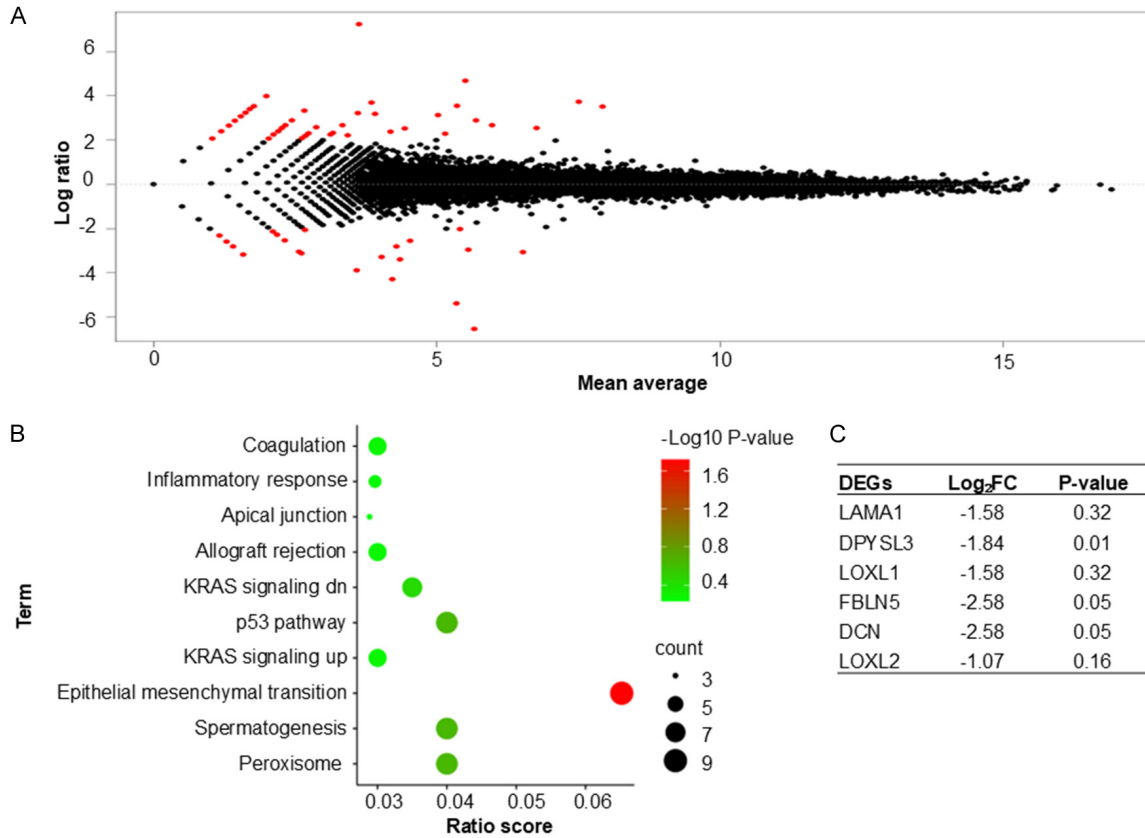

**Figure S3.** The identification of FXYD3-related DEGs in pancreatic cancer. A. The MA plot of DEGs ( $\text{Log}_2\text{FC} < 0.05$ ). B. The top 10 molecular pathways related to FXYD3. C. The EMT-related genes.
